# Supplementary material for: Association Between Neighborhood-Level Social Determinants of Health and Access to Pediatric Appendicitis Care
Source: PubMed Central journal article supplement (PMC8851303; doi:10.1001/jamanetworkopen.2021.48865), 2022-02-16
Supplement: jamanetwopen-e2148865-s001.pdf [file jamanetwopen-e2148865-s001.pdf]

## Supplementary Online Content

Bouchard ME, Kan K, Tian Y, et al. Association between neighborhood-level social determinants of health and access to pediatric appendicitis care. *JAMA Netw Open*. 2022;5(2):e2148865. doi:10.1001/jamanetworkopen.2021.48865

**eTable 1.** Agency for Healthcare Research and Quality *ICD-10* Codes Used to Identify Appendicitis Cases During the Study Period From October 1, 2015, Through September 30, 2018

**eTable 2.** Patient Characteristics for the Sensitivity Analysis, Where Complicated Appendicitis Cases Were Defined Only as Cases With *ICD-10* K35.2

**eTable 3.** Adjusted Odds Ratio (OR) of Presenting With Complicated Appendicitis Based on Each Covariate and Overall COI in the Sensitivity Analysis, Where Complicated Appendicitis Cases Were Defined Only as Cases With *ICD-10* K35.2

**eAppendix.** Additional Details on the Child Opportunity Index

This supplementary material has been provided by the authors to give readers additional information about their work.

| <b>Code</b>   | <b>Diagnosis</b>                                |
|---------------|-------------------------------------------------|
| <b>K35.2</b>  | Acute appendicitis with generalized peritonitis |
| <b>K35.3</b>  | Acute appendicitis with localized peritonitis   |
| <b>K35.80</b> | Unspecified acute appendicitis                  |
| <b>K35.89</b> | Other acute appendicitis                        |
| <b>K37</b>    | Unspecified appendicitis                        |

**eTable 1:** Agency for Healthcare Research and Quality *ICD-10* codes used to identify appendicitis cases during the study period from October 1, 2015, through September 30, 2018.

|                                     | Total N      | Simple N(%)  | Complicated N(%) | P value |
|-------------------------------------|--------------|--------------|------------------|---------|
| <b>N</b>                            | 67489        | 51315 (76.0) | 16174 (24.0)     |         |
| <b>Patient Characteristics:</b>     |              |              |                  |         |
| <b>Age</b>                          |              |              |                  | <0.001  |
| Mean (SD)                           | 10.5 (3.9)   | 10.8 (3.7)   | 9.5 (4.1)        |         |
| Median (Q1, Q3)                     | 11 (8,14)    | 11 (8,14)    | 10 (6,13)        |         |
| Range                               | 0, 18        | 0, 18        | 0, 18            |         |
| <b>Sex</b>                          |              |              |                  | <0.001  |
| Female                              | 26929 (39.9) | 20251 (39.5) | 6678 (41.3)      |         |
| Male                                | 40549 (60.1) | 31056 (60.5) | 9493 (58.7)      |         |
| Unknown                             | 11 (0.02)    | 8 (0.0)      | 3 (0.0)          |         |
| <b>Race/Ethnicity</b>               |              |              |                  | <0.001  |
| Asian                               | 1699 (2.5)   | 1259 (2.5)   | 440 (2.7)        |         |
| Hispanic                            | 24234 (35.9) | 17658 (34.4) | 6576 (40.7)      |         |
| Non-Hispanic Black                  | 4447 (6.6)   | 3301 (6.4)   | 1146 (7.1)       |         |
| Non-Hispanic White                  | 29234 (43.3) | 23065 (44.9) | 6169 (38.1)      |         |
| Other                               | 7875 (11.7)  | 6032 (11.8)  | 1843 (11.4)      |         |
| <b>Insurance</b>                    |              |              |                  | <0.001  |
| Private                             | 28991 (43.0) | 22986 (44.8) | 6005 (37.1)      |         |
| Public (Medicaid/CHIP)              | 32343 (47.9) | 23691 (46.2) | 8652 (53.5)      |         |
| Other                               | 6155 (9.1)   | 4638 (9.0)   | 1517 (9.4)       |         |
| <b>Complex Chronic Condition</b>    |              |              |                  | 0.001   |
| Yes                                 | 3607 (5.3)   | 2659 (5.2)   | 948 (5.9)        |         |
| No                                  | 63882 (94.7) | 48656 (94.8) | 15226 (94.1)     |         |
| <b>Patient Outcomes:</b>            |              |              |                  |         |
| <b>COI</b>                          |              |              |                  | <0.001  |
| Very Low                            | 15488 (23.0) | 11218 (21.9) | 4270 (26.4)      |         |
| Low                                 | 13535 (20.1) | 10055 (19.6) | 3480 (21.5)      |         |
| Moderate                            | 12668 (18.8) | 9641 (18.8)  | 3027 (18.7)      |         |
| High                                | 11487 (17.0) | 8941 (17.4)  | 2546 (15.7)      |         |
| Very High                           | 14311 (21.2) | 11460 (22.3) | 2851 (17.6)      |         |
| <b>ED Visit/ 30 day Readmission</b> |              |              |                  | <0.001  |
| Yes                                 | 10358 (15.4) | 6948 (13.5)  | 3410 (21.1)      |         |
| No                                  | 57131 (84.7) | 44367 (86.5) | 12764 (78.9)     |         |

**eTable 2:** Patient characteristics for the sensitivity analysis, where complicated appendicitis cases were defined only as cases with ICD-10 K35.2 (a high specificity indicator for complicated appendicitis). Age is reported in years. The “other” category in race/ethnicity includes Native Hawaiian Pacific Islander, American Indian and Alaskan Native. Abbreviations: n- number,

CHIP- Children's Health Insurance Program, COI- Child Opportunity Index, ED- Emergency Department.

| <b>Covariate</b>                     | <b>Adjusted complicated<br/>appendicitis OR (95%<br/>CI)</b> |
|--------------------------------------|--------------------------------------------------------------|
| <b>Sex</b>                           |                                                              |
| Female                               | 1.07 (1.03, 1.11)                                            |
| Unknown                              | 1.29 (0.34, 4.92)                                            |
| Male                                 | <i>Reference</i>                                             |
| <b>Age</b>                           |                                                              |
| 0-4                                  | 3.55 (3.29, 3.83)                                            |
| 5-9                                  | 1.68 (1.59, 1.78)                                            |
| 10-14                                | 1.32 (1.25, 1.39)                                            |
| ≥15                                  | <i>Reference</i>                                             |
| <b>Race/Ethnicity</b>                |                                                              |
| Asian                                | 1.27 (1.13, 1.42)                                            |
| Hispanic                             | 1.21 (1.14, 1.27)                                            |
| Non-Hispanic Black                   | 1.15 (1.07, 1.25)                                            |
| Other                                | 1.02 (0.96, 1.09)                                            |
| Non-Hispanic White                   | <i>Reference</i>                                             |
| <b>Insurance</b>                     |                                                              |
| Public (Medicaid/CHIP)               | 1.13 (1.08, 1.18)                                            |
| Other                                | 1.08 (1.01, 1.17)                                            |
| Private                              | <i>Reference</i>                                             |
| <b>Complex Chronic<br/>Condition</b> |                                                              |
| Yes                                  | 1.11 (1.03, 1.20)                                            |
| No                                   | <i>Reference</i>                                             |
| <b>COI Overall</b>                   |                                                              |
| Very Low                             | 1.25 (1.17, 1.33)                                            |
| Low                                  | 1.18 (1.11, 1.26)                                            |
| Moderate                             | 1.15 (1.08, 1.22)                                            |
| High                                 | 1.07 (1.01, 1.14)                                            |
| Very High                            | <i>Reference</i>                                             |

**eTable 3:** Adjusted odds ratio (OR) of presenting with complicated appendicitis based on each covariate and overall COI in the sensitivity analysis, where complicated appendicitis cases were defined only as cases with ICD-10 K35.2 (a high specificity indicator for complicated appendicitis). The COI OR was adjusted for the following covariates: sex, age, race/ethnicity, insurance type and complex chronic condition index. The “other” category in race/ethnicity

includes Native Hawaiian Pacific Islander, American Indian and Alaskan Native. Abbreviations: CHIP- Children's Health Insurance Program, COI- Child Opportunity Index.

## **eAppendix. Additional Details on the Child Opportunity Index**

We used the Child Opportunity Index (COI) 2.0 Database to complete the study. The COI captures Zip code neighborhood opportunity level information and is available for nearly all U.S. Census tract neighborhoods using 2015 data compiled from public sources, including the Census Bureau, National Center for Health Statistics, Department of Education and the Environmental Protection Agency.<sup>21</sup> After a comprehensive, multidisciplinary literary review, the COI database compiled 29 independent indicators of neighborhood characteristics that are known to influence a child's health and development, including but not limited to, access to and quality of education, healthcare, green space, nutritious food, toxin-free environments, safety and socioeconomic resources.<sup>21</sup>

The COI indicators are further sub-divided into three themed subdomains: education, health/environment and social/economic.<sup>21</sup> The education domain includes early childhood education, elementary education, secondary and postsecondary education and educational and social resources. It also captures neighborhood-level education-related resources pertaining to children and adult educational attainment, which is known to influence children's health. The health and environment domain captures features that impact children's health in utero, childhood, and transition to adulthood; these factors can ultimately influence educational attainment and socioeconomic status. This domain primarily encapsulates neighborhood environmental factors to affect health behaviors and outcomes for children, such as access to food or green space and walkability. Finally, the social and economic domain incorporates economic opportunities and social resources, such as employment rates, length of commute to work, rates of single-headed households, public assistance rate, median household income and homeownership rates. All of these separate indicators are known to influence children's health, either directly or indirectly.<sup>21</sup>

The overall COI and subdomain scores are calculated from 1 to 100 and divided into nationally-normalized quintiles, from very low to very high opportunity level. The contribution of each indicator to overall score is weighted based on how strongly an indicator predicts long-term health outcomes.<sup>21</sup> The COI has been used to increase equity awareness, to evaluate how neighborhoods affect child health and to inform resource allocation, public health interventions, and policy development.<sup>21,26</sup>
